# Supplementary material
Source: Springer Nature journal article supplement (https://www.springermedizin.de/resource/supplementary/12914_2011_218_MOESM2_ESM.pdf/9537030)

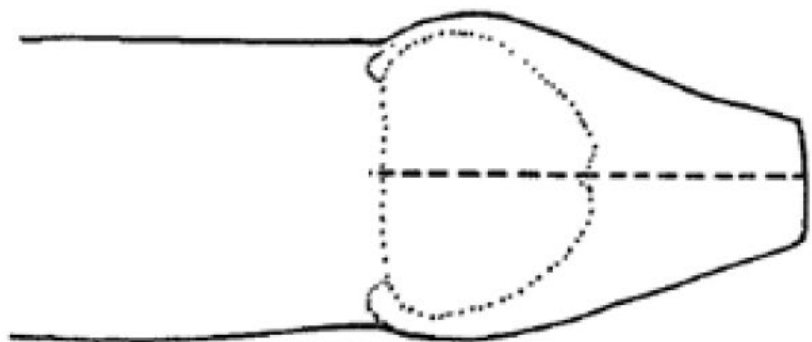

**a**

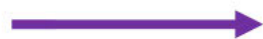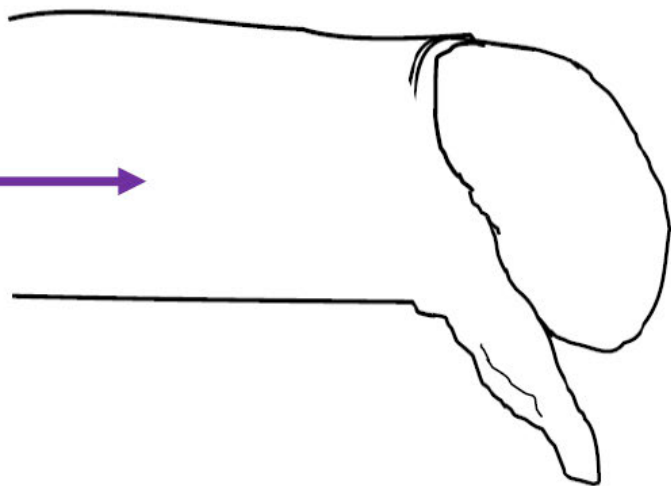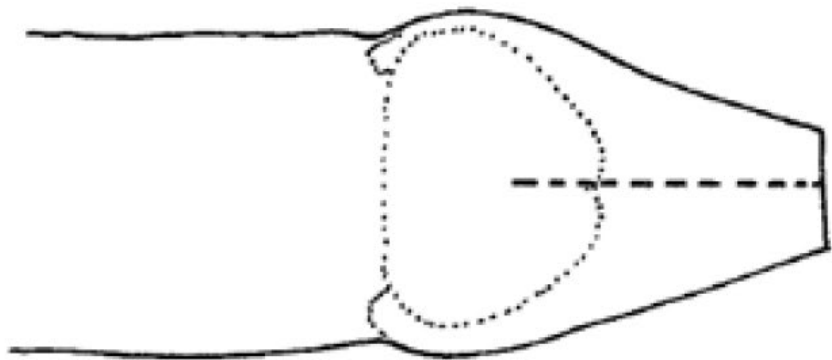

**b**

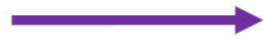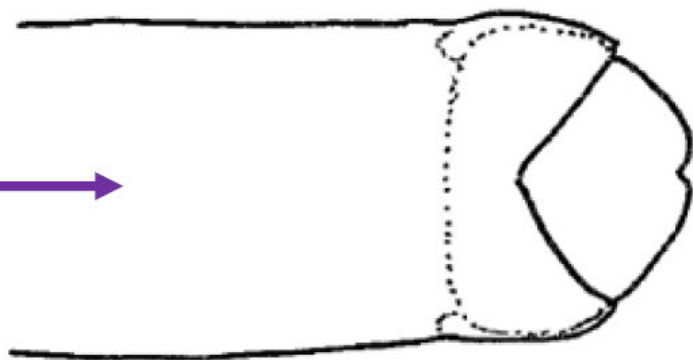

Supplement: MOESM2 [file 9537030]
